# Supplementary material
Source: PubMed Central journal article supplement (PMC5883120)
Supplement: ajtr0010-0796-f7.pdf [file ajtr0010-0796-f7.pdf]

# GsRb1 inhibit apoptosis in experimental Alzheimer's disease

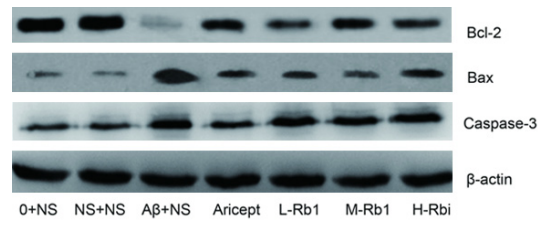

**Figure S1.** Original western blot images for **Figure 4** in the study.
